# Supplementary material
Source: PubMed Central journal article supplement (PMC8683754)
Supplement: mmc1.pdf [file mmc1.pdf]

**Supplementary Table 1: Comparison of participants who did and did not complete multiple survey rounds (n, row %)**

|                                                                   | Overall study sample<br>(n, column %)<br>(n=9061) | Completed multiple survey rounds |                        | Chi-square test<br>p-value |
|-------------------------------------------------------------------|---------------------------------------------------|----------------------------------|------------------------|----------------------------|
|                                                                   |                                                   | No<br>(n=7068, 78.0%)            | Yes<br>(n=1993, 22.0%) |                            |
| Gender                                                            |                                                   |                                  |                        | .049                       |
| Cisgender man                                                     | 4313 (47.8)                                       | 3385 (48.1)                      | 928 (46.8)             |                            |
| Cisgender woman                                                   | 4637 (51.4)                                       | 3605 (51.2)                      | 1032 (52.0)            |                            |
| Non-cisgender <sup>a</sup>                                        | 76 (0.8)                                          | 51 (0.7)                         | 25 (1.3)               |                            |
| Age                                                               |                                                   |                                  |                        | <.001                      |
| 18-34 years                                                       | 1240 (13.7)                                       | 888 (12.6)                       | 352 (17.7)             |                            |
| 35-64 years                                                       | 5296 (58.4)                                       | 3981 (56.3)                      | 1315 (66.0)            |                            |
| 65+ years                                                         | 2525 (27.9)                                       | 2199 (31.1)                      | 326 (16.4)             |                            |
| Household income                                                  |                                                   |                                  |                        | <.001                      |
| Under \$25k                                                       | 659 (7.4)                                         | 514 (7.4)                        | 145 (7.4)              |                            |
| \$25k=<\$50k                                                      | 1585 (17.8)                                       | 1270 (18.2)                      | 315 (16.1)             |                            |
| \$50k=<\$100k                                                     | 3101 (34.8)                                       | 2475 (35.5)                      | 626 (32.0)             |                            |
| \$100k +                                                          | 3578 (40.1)                                       | 2709 (38.9)                      | 869 (44.5)             |                            |
| Province                                                          |                                                   |                                  |                        | <.001                      |
| Alberta                                                           | 1066 (11.8)                                       | 861 (12.2)                       | 205 (10.3)             |                            |
| British Columbia                                                  | 1309 (14.4)                                       | 1055 (14.9)                      | 254 (12.7)             |                            |
| Manitoba                                                          | 320 (3.5)                                         | 266 (3.8)                        | 54 (2.7)               |                            |
| New Brunswick                                                     | 194 (2.1)                                         | 149 (2.1)                        | 45 (2.3)               |                            |
| Newfoundland and Labrador                                         | 136 (1.5)                                         | 103 (1.5)                        | 33 (1.7)               |                            |
| Nova Scotia                                                       | 435 (4.8)                                         | 365 (5.2)                        | 70 (3.5)               |                            |
| Ontario                                                           | 3419 (37.7)                                       | 2670 (37.8)                      | 749 (37.6)             |                            |
| Prince Edward Island                                              | 31 (0.3)                                          | 27 (0.4)                         | 4 (0.2)                |                            |
| Quebec                                                            | 1829 (20.2)                                       | 1313 (18.6)                      | 516 (25.9)             |                            |
| Saskatchewan                                                      | 296 (3.3)                                         | 233 (3.3)                        | 63 (3.2)               |                            |
| Territories <sup>b</sup>                                          | 26 (0.3)                                          | 26 (0.4)                         | 0 (0.0)                |                            |
| Ethnicity <sup>c</sup>                                            |                                                   |                                  |                        | .961                       |
| Indigenous                                                        | 272 (3.1)                                         | 213 (3.1)                        | 59 (3.1)               |                            |
| Not Indigenous                                                    | 8425 (96.9)                                       | 6587 (96.9)                      | 1838 (96.9)            |                            |
| Experienced suicidal thoughts or feelings in the previous 2 weeks |                                                   |                                  |                        | <.001                      |
| Yes                                                               | 599 (6.7)                                         | 433 (6.2)                        | 166 (8.4)              |                            |
| No                                                                | 8371 (93.3)                                       | 6569 (93.8)                      | 1802 (91.6)            |                            |

<sup>a</sup> Includes transgender woman, transgender man, and non-binary. <sup>b</sup> Includes Northwest Territories, Nunavut, and Yukon. <sup>c</sup> Participants were asked, "What is your family ethnicity" and were able to select multiple options. Respondents were classified as Indigenous if they self-identified having a family of Indigenous origins, even if they identified additional ethnic categories.

**Supplementary Table 2: Comparison of respondents who did and did not select “Prefer not to say” to the question “Have you done or experienced any of the following, as a result of the COVID-19 pandemic in the past two weeks?” (n, row %)**

|                            | Overall study sample                    | Experienced suicidal thoughts or feelings in the previous 2 weeks: Prefer not to say |                     | Chi-square test p-value |
|----------------------------|-----------------------------------------|--------------------------------------------------------------------------------------|---------------------|-------------------------|
|                            | (n, column %)<br>(n=7041 <sup>a</sup> ) | No<br>(n=7002, 99.1%)                                                                | Yes<br>(n=66, 0.9%) |                         |
| Gender                     |                                         |                                                                                      |                     | .043                    |
| Cisgender man              | 3385 (48.1)                             | 3350 (48.0)                                                                          | 35 (53.8)           |                         |
| Cisgender woman            | 3605 (51.2)                             | 3577 (51.3)                                                                          | 28 (43.1)           |                         |
| Non-cisgender <sup>b</sup> | 51 (0.7)                                | 49 (0.7)                                                                             | 2 (3.1)             |                         |
| Age                        |                                         |                                                                                      |                     | .059                    |
| 18-34 years                | 884 (12.6)                              | 871 (12.5)                                                                           | 13 (20.0)           |                         |
| 35-64 years                | 3967 (56.3)                             | 3928 (56.3)                                                                          | 39 (60.0)           |                         |
| 65+ years                  | 2190 (31.1)                             | 2177 (31.2)                                                                          | 13 (20.0)           |                         |
| Household income           |                                         |                                                                                      |                     | .015                    |
| Under \$25k                | 509 (7.3)                               | 498 (7.2)                                                                            | 11 (17.7)           |                         |
| \$25k=<\$50k               | 1266 (18.2)                             | 1254 (18.2)                                                                          | 12 (19.4)           |                         |
| \$50k=<\$100k              | 2465 (35.5)                             | 2447 (35.6)                                                                          | 18 (29.0)           |                         |
| \$100k +                   | 2703 (38.9)                             | 2682 (39.0)                                                                          | 21 (33.9)           |                         |
| Province                   |                                         |                                                                                      |                     | .874                    |
| Alberta                    | 857 (12.2)                              | 848 (12.2)                                                                           | 9 (13.8)            |                         |
| British Columbia           | 1049 (14.9)                             | 1042 (14.9)                                                                          | 7 (10.8)            |                         |
| Manitoba                   | 266 (3.8)                               | 262 (3.8)                                                                            | 4 (6.2)             |                         |
| New Brunswick              | 148 (2.1)                               | 146 (2.1)                                                                            | 2 (3.1)             |                         |
| Newfoundland and Labrador  | 103 (1.5)                               | 103 (1.5)                                                                            | 0 (0.0)             |                         |
| Nova Scotia                | 363 (5.2)                               | 358 (5.1)                                                                            | 5 (7.7)             |                         |
| Ontario                    | 2659 (37.8)                             | 2633 (37.7)                                                                          | 26 (40.0)           |                         |
| Prince Edward Island       | 27 (0.4)                                | 27 (0.4)                                                                             | 0 (0.0)             |                         |
| Quebec                     | 1311 (18.6)                             | 1300 (18.6)                                                                          | 11 (16.9)           |                         |
| Saskatchewan               | 233 (3.3)                               | 232 (3.3)                                                                            | 1 (1.5)             |                         |
| Territories <sup>c</sup>   | 25 (0.4)                                | 25 (0.4)                                                                             | 0 (0.0)             |                         |
| Ethnicity <sup>d</sup>     |                                         |                                                                                      |                     | .107                    |
| Indigenous                 | 209 (3.1)                               | 205 (3.1)                                                                            | 4 (6.7)             |                         |
| Not Indigenous             | 6569 (96.9)                             | 6513 (96.9)                                                                          | 56 (93.3)           |                         |

<sup>a</sup> Final sample is composed of 7068 participants who participated in only one survey round; sensitivity analysis excludes 27 participants who selected “Two-Spirit”, “Not listed”, or “Prefer not to answer” in the gender question. <sup>b</sup> Includes transgender woman, transgender man, and non-binary. <sup>c</sup> Includes Northwest Territories, Nunavut, and Yukon. <sup>d</sup> Participants were asked, “What is your family ethnicity” and were able to select multiple options. Respondents were classified as Indigenous if they self-identified having a family of Indigenous origins, even if they identified additional ethnic categories.

**Supplementary Table 3a: Results of logistic regression models for reporting having experienced COVID-related suicidal thoughts or feelings in the previous 2 weeks (“Prefer not to say” as “yes”)– Sample characteristics (odds ratio, 95% confidence interval) (n=7041 <sup>a</sup>)**

|                                                        | Unadjusted models  | Adjusted model<br>(including all sociodemographic factors and study round) |
|--------------------------------------------------------|--------------------|----------------------------------------------------------------------------|
| Gender                                                 |                    |                                                                            |
| Cisgender man                                          | 1.05 (0.87, 1.27)  | 1.32 (1.07, 1.64)                                                          |
| Cisgender woman                                        | Reference          | Reference                                                                  |
| Non-cisgender <sup>b</sup>                             | 8.36 (4.67, 14.97) | 3.37 (1.45, 7.82)                                                          |
| Age                                                    |                    |                                                                            |
| 18-34 years                                            | 5.64 (4.10, 7.75)  | 2.78 (1.90, 4.07)                                                          |
| 35-64 years                                            | 2.95 (2.23, 3.90)  | 2.06 (1.52, 2.80)                                                          |
| 65+ years                                              | Reference          | Reference                                                                  |
| Household income                                       |                    |                                                                            |
| Under \$25k                                            | 2.71 (2.02, 3.63)  | 1.29 (0.90, 1.85)                                                          |
| \$25k=<\$50k                                           | 1.30 (1.00, 1.69)  | 0.99 (0.72, 1.34)                                                          |
| \$50k=<\$100k                                          | 1.05 (0.83, 1.31)  | 0.84 (0.65, 1.09)                                                          |
| \$100k +                                               | Reference          | Reference                                                                  |
| Province                                               |                    |                                                                            |
| Alberta                                                | 1.06 (0.79, 1.43)  | 0.98 (0.71, 1.35)                                                          |
| British Columbia                                       | 0.88 (0.65, 1.18)  | 0.99 (0.73, 1.35)                                                          |
| Manitoba                                               | 0.78 (0.44, 1.36)  | 0.87 (0.49, 1.52)                                                          |
| New Brunswick                                          | 0.39 (0.14, 1.05)  | 0.55 (0.22, 1.38)                                                          |
| Newfoundland and Labrador                              | 1.00 (0.46, 2.19)  | 1.36 (0.59, 3.13)                                                          |
| Nova Scotia                                            | 0.98 (0.63, 1.53)  | 0.92 (0.59, 1.44)                                                          |
| Ontario                                                | Reference          | Reference                                                                  |
| Prince Edward Island                                   | 0.53 (0.07, 3.92)  | 0.46 (0.06, 3.64)                                                          |
| Quebec                                                 | 0.63 (0.46, 0.86)  | 0.86 (0.62, 1.18)                                                          |
| Saskatchewan                                           | 1.37 (0.85, 2.20)  | 1.12 (0.66, 1.91)                                                          |
| Territories <sup>c</sup>                               | 1.15 (0.27, 4.89)  | 1.22 (0.26, 5.79)                                                          |
| Marital status                                         |                    |                                                                            |
| Single                                                 | 2.60 (2.12, 3.19)  | 1.70 (1.31, 2.20)                                                          |
| Married or partnered                                   | Reference          | Reference                                                                  |
| Separated, divorced, widowed                           | 1.37 (1.04, 1.80)  | 1.41 (1.02, 1.94)                                                          |
| LGBT2Q+: Yes or unsure <sup>d</sup>                    | 3.39 (2.63, 4.35)  | 1.60 (1.19, 2.16)                                                          |
| Ethnicity: Indigenous <sup>e</sup>                     | 2.89 (1.98, 4.20)  | 1.85 (1.21, 2.83)                                                          |
| Pre-existing mental health condition: Yes <sup>f</sup> | 6.41 (5.28, 7.77)  | 5.05 (4.07, 6.27)                                                          |
| Study round                                            |                    |                                                                            |
| Round 1 (May 2020)                                     | Reference          | Reference                                                                  |
| Round 2 (September 2020)                               | 1.19 (0.97, 1.46)  | 1.44 (1.14, 1.82)                                                          |

Round 3 (January 2021)

0.79 (0.61, 1.03)

1.01 (0.76, 1.35)

<sup>a</sup> Final sample is composed of 7068 participants who participated in only one survey round; sensitivity analyses exclude 27 participants who selected “Two-Spirit”, “Not listed”, or “Prefer not to answer” in the gender question. <sup>b</sup> Includes transgender woman, transgender man, and non-binary. <sup>c</sup> Includes Northwest Territories, Nunavut, and Yukon. <sup>d</sup> Participants were asked, “Do you identify as being LGBT2Q+ (lesbian, gay, bisexual, trans, two-spirit, queer, etc.)?” <sup>e</sup> Participants were asked, “What is your family ethnicity?” and were able to select multiple options. Respondents were classified as Indigenous if they self-identified having a family of Indigenous origins, even if they identified additional ethnic categories. <sup>f</sup> Participants were asked, “Do you identify as a person who has a pre-existing (prior to COVID-19) mental health condition?”

**Supplementary Table 3b: Results of logistic regression models for reporting having experienced COVID-related suicidal thoughts or feelings in the previous 2 weeks (“Prefer not to say” as “no”)– Sample characteristics (odds ratio, 95% confidence interval) (n=7041 <sup>a</sup>)**

|                            | Unadjusted models  | Adjusted model<br>(including all sociodemographic factors and study round) |
|----------------------------|--------------------|----------------------------------------------------------------------------|
| Gender                     |                    |                                                                            |
| Cisgender man              | 1.01 (0.83, 1.23)  | 1.27 (1.01, 1.59)                                                          |
| Cisgender woman            | Reference          | Reference                                                                  |
| Non-cisgender <sup>b</sup> | 8.04 (4.42, 14.63) | 2.59 (1.06, 6.30)                                                          |
| Age                        |                    |                                                                            |
| 18-34 years                | 6.34 (4.47, 8.99)  | 3.21 (2.12, 4.85)                                                          |
| 35-64 years                | 3.26 (2.39, 4.45)  | 2.34 (1.67, 3.28)                                                          |
| 65+ years                  | Reference          | Reference                                                                  |
| Household income           |                    |                                                                            |
| Under \$25k                | 2.61 (1.91, 3.57)  | 1.28 (0.87, 1.89)                                                          |
| \$25k=<\$50k               | 1.31 (0.99, 1.73)  | 1.04 (0.75, 1.44)                                                          |
| \$50k=<\$100k              | 1.06 (0.83, 1.35)  | 0.89 (0.68, 1.17)                                                          |
| \$100k +                   | Reference          | Reference                                                                  |
| Province                   |                    |                                                                            |
| Alberta                    | 1.06 (0.79, 1.43)  | 0.96 (0.68, 1.35)                                                          |
| British Columbia           | 0.88 (0.65, 1.18)  | 1.03 (0.75, 1.43)                                                          |
| Manitoba                   | 0.78 (0.44, 1.36)  | 0.78 (0.42, 1.45)                                                          |
| New Brunswick              | 0.39 (0.14, 1.05)  | 0.49 (0.17, 1.37)                                                          |
| Newfoundland and Labrador  | 1.00 (0.46, 2.19)  | 1.61 (0.70, 3.71)                                                          |
| Nova Scotia                | 0.98 (0.63, 1.53)  | 0.82 (0.50, 1.33)                                                          |
| Ontario                    | Reference          | Reference                                                                  |
| Prince Edward Island       | 0.53 (0.07, 3.92)  | 0.52 (0.07, 4.16)                                                          |
| Quebec                     | 0.63 (0.46, 0.86)  | 0.86 (0.61, 1.21)                                                          |
| Saskatchewan               | 1.37 (0.85, 2.20)  | 1.20 (0.70, 2.08)                                                          |
| Territories <sup>c</sup>   | 1.15 (0.27, 4.89)  | 1.49 (0.31, 7.17)                                                          |

|                                                        |                   |                   |
|--------------------------------------------------------|-------------------|-------------------|
| Marital status                                         |                   |                   |
| Single                                                 | 2.51 (2.02, 3.12) | 1.64 (1.25, 2.15) |
| Married or partnered                                   | Reference         | Reference         |
| Separated, divorced, widowed                           | 1.28 (0.95, 1.72) | 1.31 (0.93, 1.85) |
| LGBT2Q+: Yes or unsure <sup>d</sup>                    | 3.60 (2.78, 4.68) | 1.66 (1.22, 2.27) |
| Ethnicity: Indigenous <sup>e</sup>                     | 2.90 (1.95, 4.31) | 1.86 (1.20, 2.89) |
| Pre-existing mental health condition: Yes <sup>f</sup> | 6.75 (5.50, 8.29) | 5.24 (4.16, 6.59) |
| Study round                                            |                   |                   |
| Round 1 (May 2020)                                     | Reference         | Reference         |
| Round 2 (September 2020)                               | 1.27 (1.03, 1.58) | 1.55 (1.21, 1.98) |
| Round 3 (January 2021)                                 | 0.78 (0.59, 1.03) | 1.03 (0.76, 1.41) |

<sup>a</sup> Final sample is composed of 7068 participants who participated in only one survey round; sensitivity analyses exclude 27 participants who selected “Two-Spirit”, “Not listed”, or “Prefer not to answer” in the gender question. <sup>b</sup> Includes transgender woman, transgender man, and non-binary. <sup>c</sup> Includes Northwest Territories, Nunavut, and Yukon. <sup>d</sup> Participants were asked, “Do you identify as being LGBT2Q+ (lesbian, gay, bisexual, trans, two-spirit, queer, etc.)?” <sup>e</sup> Participants were asked, “What is your family ethnicity?” and were able to select multiple options. Respondents were classified as Indigenous if they self-identified having a family of Indigenous origins, even if they identified additional ethnic categories. <sup>f</sup> Participants were asked, “Do you identify as a person who has a pre-existing (prior to COVID-19) mental health condition?”

**Supplementary Table 4a: Results of logistic regression models for reporting having experienced COVID-related suicidal thoughts or feelings in the previous 2 weeks (“Prefer not to say” as “yes”) – Pandemic-related stressors (odds ratio, 95% confidence interval) (n=7041 <sup>a</sup>)**

|                                                         | Unadjusted models   | Adjusted models<br>(individual models for each stressor, also including<br>sociodemographic factors and study round) |
|---------------------------------------------------------|---------------------|----------------------------------------------------------------------------------------------------------------------|
| Financial stressors                                     |                     |                                                                                                                      |
| Financial concerns                                      | 3.45 (2.85, 4.17)   | 2.43 (1.96, 3.02)                                                                                                    |
| Losing their job                                        | 3.07 (2.54, 3.72)   | 2.43 (1.95, 3.03)                                                                                                    |
| Relationship stressors                                  |                     |                                                                                                                      |
| Experiencing relationship challenges                    | 3.18 (2.62, 3.86)   | 2.90 (2.30, 3.65)                                                                                                    |
| Being safe from physical or emotional domestic violence | 2.51 (1.95, 3.23)   | 1.99 (1.46, 2.70)                                                                                                    |
| Increased substance use                                 |                     |                                                                                                                      |
| Drinking alcohol                                        | 2.24 (1.83, 2.75)   | 1.92 (1.52, 2.43)                                                                                                    |
| Use of tobacco products                                 | 4.46 (3.44, 5.79)   | 2.55 (1.85, 3.51)                                                                                                    |
| Use of cannabis products                                | 5.25 (4.15, 6.64)   | 2.86 (2.16, 3.78)                                                                                                    |
| Use of prescribed medication                            | 7.66 (5.86, 10.00)  | 3.41 (2.45, 4.75)                                                                                                    |
| Use of other psychoactive substances                    | 10.23 (6.68, 15.69) | 4.06 (2.31, 7.13)                                                                                                    |
| COVID-19 stressors                                      |                     |                                                                                                                      |

|                                                                                    |                     |                   |
|------------------------------------------------------------------------------------|---------------------|-------------------|
| Tested positive for COVID-19                                                       | 11.16 (6.23, 19.98) | 4.21 (1.79, 9.88) |
| Someone in their household tested positive for COVID-19                            | 6.62 (3.62, 12.12)  | 1.63 (0.60, 4.46) |
| Family member/loved one living at a different address tested positive for COVID-19 | 1.27 (0.84, 1.92)   | 1.06 (0.65, 1.75) |
| Fear of getting severely sick or dying                                             | 1.88 (1.57, 2.26)   | 1.61 (1.31, 1.98) |

<sup>a</sup> Final sample is composed of 7068 participants who participated in only one survey round; sensitivity analyses exclude 27 participants who selected “Two-Spirit”, “Not listed”, or “Prefer not to answer” in the gender question.

**Supplementary Table 4b: Results of logistic regression models for reporting having experienced COVID-related suicidal thoughts or feelings in the previous 2 weeks (“Prefer not to say” as “no”) – Pandemic-related stressors (odds ratio, 95% confidence interval) (n=7041 <sup>a</sup>)**

|                                                                                    | Unadjusted models   | Adjusted models<br>(individual models for each stressor, also including<br>sociodemographic factors and study round) |
|------------------------------------------------------------------------------------|---------------------|----------------------------------------------------------------------------------------------------------------------|
| <b>Financial stressors</b>                                                         |                     |                                                                                                                      |
| Financial concerns                                                                 | 3.61 (2.95, 4.43)   | 2.47 (1.96, 3.11)                                                                                                    |
| Losing their job                                                                   | 3.36 (2.74, 4.10)   | 2.60 (2.06, 3.28)                                                                                                    |
| <b>Relationship stressors</b>                                                      |                     |                                                                                                                      |
| Experiencing relationship challenges                                               | 3.28 (2.67, 4.03)   | 2.84 (2.23, 3.62)                                                                                                    |
| Being safe from physical or emotional domestic violence                            | 2.52 (1.93, 3.29)   | 2.04 (1.48, 2.80)                                                                                                    |
| <b>Increased substance use</b>                                                     |                     |                                                                                                                      |
| Drinking alcohol                                                                   | 2.38 (1.92, 2.94)   | 1.96 (1.53, 2.50)                                                                                                    |
| Use of tobacco products                                                            | 4.71 (3.60, 6.18)   | 2.57 (1.84, 3.57)                                                                                                    |
| Use of cannabis products                                                           | 5.49 (4.30, 7.02)   | 2.89 (2.17, 3.86)                                                                                                    |
| Use of prescribed medication                                                       | 7.75 (5.88, 10.22)  | 3.39 (2.41, 4.78)                                                                                                    |
| Use of other psychoactive substances                                               | 10.95 (7.11, 16.87) | 4.35 (2.46, 7.70)                                                                                                    |
| <b>COVID-19 stressors</b>                                                          |                     |                                                                                                                      |
| Tested positive for COVID-19                                                       | 13.07 (7.29, 23.43) | 4.97 (2.11, 11.68)                                                                                                   |
| Someone in their household tested positive for COVID-19                            | 7.74 (4.23, 14.18)  | 1.93 (0.71, 5.26)                                                                                                    |
| Family member/loved one living at a different address tested positive for COVID-19 | 1.42 (0.93, 2.17)   | 1.16 (0.70, 1.93)                                                                                                    |
| Fear of getting severely sick or dying                                             | 1.98 (1.62, 2.40)   | 1.66 (1.33, 2.07)                                                                                                    |

<sup>a</sup> Final sample is composed of 7068 participants who participated in only one survey round; sensitivity analyses exclude 27 participants who selected “Two-Spirit”, “Not listed”, or “Prefer not to answer” in the gender question.
